# Supplementary material for: Salinity and temperature affect growth rate of Alphamyces chaetifer and Gorgonomyces haynaldii (Chytridiomycota) isolated from coastal habitats of Taiwan
Source: publisher site journal article supplement (doi:10.1515/bot-2023-0011), 2023-06-20
Supplement: Supplementary file 1 [file j_bot-2023-0011_suppl_001.docx]

**Supplementary Material**

**Salinity and temperature affect growth rate of** ***Alphamyces* *chaetifer* and *Gorgonomyces* *haynaldii* (Chytridiomycota) isolated from coastal habitats of Taiwan**

Sheng-Yu Guo et al.

DOI 10.1515/bot-2023-0011

**Supplementary Table S1:** BLASTn search results of the fungi isolated in this study.

| **Taxon** | **Isolate no.** | **Accession no.** | **BLASTn result (identity/sequence length/coverage/similarity)** |
| --- | --- | --- | --- |
| *Alphamyces chaetifer* | IMB230 | OQ473030 | *Alphamyces chaetifer* NR_119646.1/746/100%/98.73% |
| *Alphamyces chaetifer* | IMB231 | OQ473031 | *Alphamyces chaetifer* NR_119646.1/746/100%/98.73% |
| *Alphamyces chaetifer* | IMB232 | OQ473032 | *Alphamyces chaetifer* NR_119646.1/746/100%/98.31% |
| *Gorgonomyces haynaldii* | IMB233 | OQ473033 | *Gorgonomyces haynaldii* MT730975.1/4108/100%/99.79% |
| *Gorgonomyces haynaldii* | IMB237 | OQ473034 | *Gorgonomyces haynaldii* MT730975.1/4108/100%/99.79% |
| *Gorgonomyces haynaldii* | IMB239 | OQ473035 | *Gorgonomyces haynaldii* MT730975.1/4108/100%/99.79% |
